# Supplementary material for: Multiresistant Bacteria Isolated from Intestinal Faeces of Farm Animals in Austria
Source: MDPI journal article supplement (doi:10.3390/antibiotics10040466), 2021-04-20
Supplement: s1 [file s1]

**Table S1.** Antibiotic resistance profile and resistance genes of multiresistant bacteria isolated from the intestine of swine and broiler.

| Isolate <sup>a</sup> | Species    | Sample <sup>b</sup> | Encoding resistance | Resistance pattern <sup>c</sup>          | AM | AMC | CN | CXM | FOX | CTX | GM | SXT | CIP | MXF | TZP | CL | TGC | CAZ | FEP | IPM | AN | MEM | TE30 | NA30 | C30 | VA | LZD | TEC |
|----------------------|------------|---------------------|---------------------|------------------------------------------|----|-----|----|-----|-----|-----|----|-----|-----|-----|-----|----|-----|-----|-----|-----|----|-----|------|------|-----|----|-----|-----|
| SD 3/1-100a          | E. coli    | sw_01               | CTX-M1              | am, cn, cxm, sxt, tgc, tet               | R  | S   | R  | R   | S   | R   | S  | R   | S   | S   | S   | S  | S   | S   | R   | S   | S  | S   | R    | S    | S   |    |     |     |
| SD 3/2-100a          | E. coli    | sw_02               | CTX-M1              | am, cn, cxm, fox, ctx, sxt, tgc, tet, na | R  | S   | R  | R   | R   | R   | S  | R   | S   | S   | S   | S  | S   | S   | R   | S   | S  | S   | R    | R    | R   |    |     |     |
| SD 3/4-100c          | E. coli    | sw_03               | CTX-M1              | am, cn, cxm, ctx, tgc, fep               | R  | S   | R  | R   | S   | R   | S  | S   | S   | S   | S   | S  | S   | R   | R   | S   | S  | S   | S    | S    | S   |    |     |     |
| SD 3/4-100d          | E. coli    | sw_04               | CTX-M1              | am, cn, cxm, ctx, sxt, tgc, fep, tet     | R  | S   | R  | R   | S   | R   | S  | R   | S   | S   | S   | S  | S   | R   | R   | S   | S  | S   | R    | S    | S   |    |     |     |
| SD 3/5-100b          | E. coli    | sw_05               | TEM-52              | am, cxm, ctx, sxt, tgc, caz, tet         | R  | S   | S  | R   | S   | R   | S  | S   | S   | S   | S   | S  | S   | R   | S   | S   | S  | S   | R    | S    | S   |    |     |     |
| SD 3/5-100c          | E. coli    | sw_06               | CTX-M1              | am, cn, cxm, ctx, tgc, fep, tet          | R  | S   | R  | R   | S   | R   | S  | S   | S   | S   | S   | S  | S   | S   | R   | S   | S  | S   | R    | S    | S   |    |     |     |
| SD 3/5-100e          | E. coli    | sw_07               | CTX-M1              | am, cn, cxm, ctx, sxt, tgc, fep          | R  | S   | R  | R   | S   | R   | S  | R   | S   | S   | S   | S  | S   | R   | R   | S   | S  | S   | S    | S    | S   |    |     |     |
| SD 4/2-100a          | E. coli    | sw_08               | CTX-M1              | am, cn, cxm, ctx, gm, sxt, tgc, fep, c   | R  | S   | R  | R   | S   | R   | R  | R   | S   | S   | S   | S  | S   | S   | R   | S   | S  | S   | S    | S    | S   | R  |     |     |
| SD 4/4-100a          | E. coli    | sw_09               | CTX-M1              | am, cn, cxm, ctx, sxt, tgc, tet          | R  | S   | R  | R   | S   | R   | S  | R   | S   | S   | S   | S  | S   | S   | R   | S   | S  | S   | R    | S    | S   |    |     |     |
| SD 5/1-100a          | E. coli    | sw_10               | CTX-M14             | am, cn, cxm, ctx, tgc, tet               | R  | S   | R  | R   | S   | R   | S  | S   | S   | S   | S   | S  | S   | S   | S   | S   | S  | S   | R    | S    | S   |    |     |     |
| SD 5/1-100b          | E. coli    | sw_11               | CTX-M1              | am, cn, cxm, ctx, sxt, fep               | R  | S   | R  | R   | S   | R   | S  | R   | S   | S   | S   | S  | S   | R   | R   | S   | S  | S   | S    | S    | S   |    |     |     |
| SD 5/2-100a          | E. coli    | sw_12               | CTX-M1              | am, cn, cxm, ctx, caz, fep               | R  | S   | R  | R   | S   | R   | S  | S   | S   | S   | S   | S  | S   | R   | R   | S   | S  | S   | S    | S    | S   |    |     |     |
| SD 5/2-100d          | E. coli    | sw_13               | CTX-M14             | am, cn, cxm, ctx, fep, tet               | R  | S   | R  | R   | S   | R   | S  | S   | S   | S   | S   | S  | S   | R   | R   | S   | S  | S   | R    | S    | S   |    |     |     |
| SD 5/3-100a          | E. coli    | sw_14               | CTX-M1              | am, cn, cxm, ctx, fep, tet               | R  | S   | R  | R   | S   | R   | S  | S   | S   | S   | S   | S  | S   | R   | R   | S   | S  | S   | S    | S    | S   |    |     |     |
| SD 5/5-100a          | E. coli    | sw_15               | CTX-M1              | am, cn, cxm, ctx, sxt, fep               | R  | S   | R  | R   | S   | R   | S  | R   | S   | S   | S   | S  | S   | R   | R   | S   | S  | S   | S    | S    | S   |    |     |     |
| SD 6/2-100a          | E. coli    | sw_16               | CTX-M1              | am, cn, cxm, ctx, fep, tet, na           | R  | S   | R  | R   | S   | R   | S  | S   | S   | S   | S   | S  | S   | S   | R   | S   | S  | S   | R    | R    | S   |    |     |     |
| SD 6/2-100d          | E. coli    | sw_17               | CTX-M1              | am, cn, cxm, ctx, fep, tet, na           | R  | S   | R  | R   | S   | R   | S  | S   | S   | S   | S   | S  | S   | R   | R   | S   | S  | S   | R    | R    | S   |    |     |     |
| SD 6/4-100a          | E. coli    | sw_18               | CTX-M14             | am, cn, cxm, ctx, tet, na                | R  | S   | R  | R   | S   | R   | S  | S   | S   | S   | S   | S  | S   | S   | S   | S   | S  | S   | R    | R    | S   |    |     |     |
| SD 6/4-100c          | E. coli    | sw_19               | CTX-M14             | am, cn, cxm, ctx, fep, tet, na           | R  | S   | R  | R   | S   | R   | S  | S   | S   | S   | S   | S  | S   | R   | R   | S   | S  | S   | R    | R    | S   |    |     |     |
| SD 10/1-100b         | E. coli    | sw_20               | CTX-M1              | am, cn, cxm, ctx, sxt, tet               | R  | S   | R  | R   | S   | R   | S  | R   | S   | S   | S   | S  | S   | R   | R   | S   | S  | S   | R    | S    | S   |    |     |     |
| SD 10/4-100a         | E. coli    | sw_21               | CTX-M1              | am, cn, cxm, ctx, tet                    | R  | S   | R  | R   | S   | R   | S  | S   | S   | S   | S   | S  | S   | S   | R   | S   | S  | S   | R    | S    | S   |    |     |     |
| SD 10/5-100a         | E. coli    | sw_22               | CTX-M1              | am, cn, cxm, ctx, gm, sxt, tet, c        | R  | S   | R  | R   | S   | R   | R  | R   | S   | S   | S   | S  | S   | S   | R   | S   | S  | S   | R    | S    | S   | R  |     |     |
| SD 11/4-100a         | E. coli    | sw_23               | CTX-M1              | am, cn, cxm, ctx, fep, tet, na           | R  | S   | R  | R   | S   | R   | S  | S   | S   | S   | S   | S  | S   | R   | R   | S   | S  | S   | R    | R    | S   |    |     |     |
| SD 11/5-100a         | E. coli    | sw_24               | CTX-M1              | am, cn, cxm, ctx, fep, tet, na           | R  | S   | R  | R   | S   | R   | S  | S   | S   | S   | S   | S  | S   | R   | R   | S   | S  | S   | R    | R    | S   |    |     |     |
| SD 15/1-100b         | E. coli    | sw_25               | CTX-M1              | am, cn, cxm, ctx, tet                    | R  | S   | R  | R   | S   | R   | S  | S   | S   | S   | S   | S  | S   | R   | R   | S   | S  | S   | R    | S    | S   |    |     |     |
| SD 15/2-100a         | E. coli    | sw_26               | CTX-M1              | am, cn, cxm, ctx, fep, tet               | R  | S   | R  | R   | S   | R   | S  | S   | S   | S   | S   | S  | S   | S   | R   | S   | S  | S   | R    | S    | S   |    |     |     |
| SD 15/3-100a         | E. coli    | sw_27               | CTX-M1              | am, cn, cxm, ctx, tet, na                | R  | S   | R  | R   | S   | R   | S  | S   | S   | S   | S   | S  | S   | S   | R   | S   | S  | S   | R    | R    | S   |    |     |     |
| SD 15/5-100a         | E. coli    | sw_28               | CTX-M1              | am, cn, cxm, ctx, fep, tet               | R  | S   | R  | R   | S   | R   | S  | S   | S   | S   | S   | S  | S   | S   | R   | S   | S  | S   | R    | S    | S   |    |     |     |
| SD 15/6-100a         | E. coli    | sw_29               | CTX-M1              | am, cn, cxm, ctx, tet                    | R  | S   | R  | R   | S   | R   | S  | S   | S   | S   | S   | S  | S   | S   | R   | S   | S  | S   | R    | S    | S   |    |     |     |
| SD 15/10-100a        | E. coli    | sw_30               | CTX-M1              | am, cn, cxm, ctx, fep                    | R  | S   | R  | R   | S   | R   | S  | S   | S   | S   | S   | S  | S   | R   | R   | S   | S  | S   | S    | S    | S   |    |     |     |
| HD 1/1 100a Th       | E. coli    | bs_31               | SHV-12              | am, cxm, ctx, sxt, caz, tet, na, c       | R  | S   | S  | R   | S   | R   | S  | R   | S   | S   | S   | S  | S   | R   | S   | S   | S  | S   | R    | R    | R   |    |     |     |
| HD 1/1 100b Th       | E. coli    | bs_32               | SHV-12              | am, cxm, ctx, sxt, caz, tet, na, c       | R  | S   | S  | R   | S   | R   | S  | R   | S   | S   | S   | S  | S   | R   | S   | S   | S  | S   | R    | R    | R   |    |     |     |
| HD 1/1 100c Th       | E. coli    | bs_33               | SHV-12              | am, cxm, ctx, sxt, caz, tet, na, c       | R  | S   | S  | R   | S   | R   | S  | R   | S   | S   | S   | S  | S   | R   | S   | S   | S  | S   | R    | R    | R   |    |     |     |
| HD 1/2 100a Th       | E. coli    | bs_34               | CTX-M1              | am, cn, cxm, ctx, caz, tet, na, c        | R  | S   | R  | R   | S   | R   | S  | S   | S   | S   | S   | S  | S   | R   | S   | S   | S  | S   | R    | R    | R   |    |     |     |
| HD 1/2 100b Th       | E. coli    | bs_35               | SHV-12              | am, cn, cxm, ctx, caz, tet, na, c        | R  | S   | R  | R   | S   | R   | S  | S   | S   | S   | S   | S  | S   | R   | S   | S   | S  | S   | R    | R    | R   |    |     |     |
| HD 1/2 100c Th       | E. coli    | bs_36               | CTX-M1              | am, cn, cxm, ctx, caz, tet, na, c        | R  | S   | R  | R   | S   | R   | S  | R   | S   | R   | S   | S  | S   | R   | S   | S   | S  | S   | R    | R    | R   |    |     |     |
| HD 1/2 100d Th       | E. coli    | bs_37               | SHV-12              | am, ctx, caz, tet, na, c                 | R  | S   | S  | S   | S   | R   | S  | S   | S   | R   | S   | S  | S   | R   | S   | S   | S  | S   | R    | R    | R   |    |     |     |
| HD 2/9-0a            | E. coli    | bs_38               | SHV-12              | am, cxm, ctx, caz, tet, na, c            | R  | S   | S  | R   | S   | R   | S  | S   | S   | S   | S   | S  | S   | R   | S   | S   | S  | S   | R    | R    | R   |    |     |     |
| HD 3/10-0c           | E. coli    | bs_39               | SHV-12              | am, sxt, caz, tet, na                    | R  | S   | S  | S   | S   | R   | S  | R   | S   | S   | S   | S  | S   | R   | S   | S   | S  | S   | R    | R    | R   |    |     |     |
| HD 3/2 100a          | E. coli    | bs_40               | SHV-12              | am, sxt, caz, tet, na, c                 | R  | S   | S  | S   | S   | R   | S  | R   | S   | R   | S   | S  | S   | R   | S   | S   | S  | S   | R    | R    | R   |    |     |     |
| HD 3/3-100a          | E. coli    | bs_41               | SHV-12              | am, sxt, caz, tet, na, c                 | R  | S   | S  | S   | S   | R   | S  | R   | S   | S   | S   | S  | S   | R   | S   | S   | S  | S   | R    | R    | R   |    |     |     |
| HD 3/4-0a            | E. coli    | bs_42               | SHV-12              | am, sxt, caz, tet, na, c                 | R  | S   | S  | S   | S   | R   | S  | R   | S   | S   | S   | S  | S   | R   | S   | S   | S  | S   | R    | R    | R   |    |     |     |
| HD 3/5-0a            | E. coli    | bs_43               | SHV-12              | am, sxt, caz, tet, na, c                 | R  | S   | S  | S   | S   | R   | S  | R   | S   | S   | S   | S  | S   | R   | S   | S   | S  | S   | R    | R    | R   |    |     |     |
| HD 8/2-100a          | E. coli    | bs_44               | SHV-2               | am                                       | R  | S   | S  | S   | S   | R   | S  | S   | S   | S   | S   | S  | S   | S   | S   | S   | S  | S   | S    | S    | S   |    |     |     |
| HD 9/2-0b            | E. coli    | bs_45               | SHV-12              | am, caz, tet                             | R  | S   | S  | S   | S   | R   | S  | S   | S   | S   | S   | S  | S   | R   | S   | S   | S  | S   | R    | S    | R   |    |     |     |
| HD 9/2-100b          | E. coli    | bs_46               | SHV-12              | am, sxt, caz, tet, na                    | R  | S   | S  | S   | S   | R   | S  | R   | S   | S   | S   | S  | S   | R   | S   | S   | S  | S   | R    | R    | R   |    |     |     |
| HD 6/1-1a            | E. faecium | bs_47               | VanA                | am, va                                   | R  |     |    |     |     |     |    | S   |     |     |     |    |     |     |     |     |    |     |      |      |     | R  | S   | R   |
| HD 5/3-2a            | E. faecium | bs_48               | VanA                | am, va                                   | R  |     |    |     |     |     |    | S   |     |     |     |    |     |     |     |     |    |     |      |      |     | R  | S   | R   |

<sup>a</sup> SD x/y...intestine of swine, herd number/isolate number, HD x/y...intestine of broiler, herd number/isolate number

<sup>b</sup> sw...intestine sample taken from swine, bs.... intestine sample taken from broiler

<sup>c</sup> am, ampicillin; amc, amoxicillin/clavulanic acid; tzp, piperacillin/tazobactam; cn, cephalaxin; cxm, cefuroxime; fox, cefoxitin; ctx, cefotaxime; caz, ceftazidime; fep, cefepime; cip, ciprofloxacin; mxm, moxifloxacin; gm, gentamicin; an, amikacin; sxt, trimethoprim/sulfamethoxazole; cl, clindamycin; tgc, tigecycline; ipm, imipenem; mem, meropenem; te, tetracycline; na, nalidixic acid; c, chloramphenicol; va, vancomycin; lz, linezolid; tec, teicoplanin.
